# Supplementary material for: Vegetation response varies by season of burning in pine woodlands across the southeastern US
Source: Research Square preprint supplement (doi:10.21203/rs.3.rs-7787026/v1), 2025-10-28
Supplement: Supplementary file 1 [file 2e400539f9d216b917afa611.docx]

**Table S1** Dominant tree species, age of stand, tree density, basal area, percent sunlight, soil type (NRCS 2022), elevation, slope, aspect, and coordinates of nine sites included in study to investigate the effects of season of burning on the plant community in Alabama, Mississippi, South Carolina, and Tennessee at the onset of the study in 2020.

| Site | Bridgestone | Barbour | Belfast | Copiah | Folsom | Foothills | Mason Bend | Triple Creek | Hamilton Ridge |
| --- | --- | --- | --- | --- | --- | --- | --- | --- | --- |
| Dominant tree species | *Pinus echniata* | *Pinus taeda* | *P. taeda* | *P. echinata, P. taeda* | *P. taeda* | *P. echinata, Quercus alba* | *P. taeda* | *P. taeda* | *P. taeda* |
| Age (years) | 8 | 24 | 27 | 61 | 18 | 83 | 21 | 25 | 31 |
| Tree density (stems/ha) | N/A | 175 | 175 | 141 | 450 | 89 | 299 | 116 | 121 |
| Basal area (m2/ha) | N/A | 8 | 12 | 15 | 9 | 8 | 10 | 10 | 11 |
| Sunlight (%) | 100 | 58 | 50 | 45 | 53 | 66 | 16 | 52 | 56 |
| Soils | Lonewood silt loam | Luverne-Springhill complex, sandy loam | Cecil sandy clay loam | Loring silt loam and Lorman-Smithdale association | Smithdale sandy loam | Ramsey stony fine sandy loam | Cahaba fine sandy loam | Savannah fine sandy loam | Eulonia fine sandy loam |
| Elevation (m) | 557 | 113 | 169 | 101 | 95 | 377 | 30 | 93 | 15 |
| Slope (%) | 5 – 12 | 15 – 45 | 2 – 6 | 2 – 5 | 5 – 15 | 50 – 70 | 0 – 2 | 2 – 5 | 0 – 2 |
| Aspect | NW/W | SW | W | S | S | SW/W | W/SW | S | SW |
| Coordinates | 35°46'46.94"N, 85°18'55.24"W | 31°58'5.50"N, 85°21'2.69"W | 34°16'53.29"N, 81°53'13.77"W | 31°48'25.63"N, 90°40'46.94"W | 32°38'40.76"N, 87°25'33.42"W | 35°36'25.70"N, 84° 1'36.80"W | 32°45'46.22"N, 87°48'12.52"W | 32°0'22.11"N, 88°55'9.70"W | 32°38'8.59"N, 81°22'29.88"W |

**Table S2** Mean air temperature (℃), in-stand wind speed (m/s), and relative humidity (%) for fire treatments over four years (2020–2023) and after two iterations of fire treatments during the dormant (DOS), early growing- (EGS), mid-growing- (MGS), and late (LGS) growing-seasons at nine sites dominated by shortleaf or loblolly pine in Tennessee, South Carolina, Alabama, and Mississippi.

| Treatment | Air temperature | In-stand wind speed | Relative humidity |
| --- | --- | --- | --- |
| DOS | 20.2±1.7 | 2.9±0.7 | 39.7±9.4 |
| EGS | 25.2±0.8 | 3.1±0.7 | 39.5±9.3 |
| MGS | 32.7±0.7 | 1.2±0.3 | 57.7±13.6 |
| LGS | 25.9±1.2 | 2.4±0.6 | 40.7±9.6 |

**Table S3** Mean values of the Shannon-Weiner plant diversity index, plant species richness, and plant species evenness over four years (2020–2023) after two iterations of dormant (DOS), early growing- (EGS), mid-growing- (MGS), and late (LGS) growing-season fire at nine sites dominated by shortleaf or loblolly pine in Tennessee, South Carolina, Alabama, and Mississippi. Column means with the same letter are not different (α = 0.05).

| Treatment | Mean diversity index | Group | Mean species richness | Group | Mean species evenness | Group |
| --- | --- | --- | --- | --- | --- | --- |
| Control | 2.49±0.07 | a | 26.9±1.1 | ab | 0.77±0.01 | a |
| DOS | 2.60±0.07 | a | 28.7±1.1 | b | 0.78±0.01 | a |
| EGS | 2.49±0.07 | a | 24.2±1.1 | a | 0.79±0.01 | a |
| MGS | 2.54±0.07 | a | 25.5±1.1 | ab | 0.80±0.01 | a |
| LGS | 2.58±0.07 | a | 26.8±1.1 | ab | 0.79±0.01 | a |

**Table S4.** Output of the linear mixed effects model examining the effects of treatment and year on forb percent cover over four years (2020–2023) after two iterations of dormant (DOS), early growing- (EGS), mid-growing- (MGS), and late (LGS) growing-season fire at nine sites dominated by shortleaf or loblolly pine in Tennessee, South Carolina, Alabama, and Mississippi.

| Response Variable: Forb Percent Cover | | | | |
| --- | --- | --- | --- | --- |
| Model: forb percent cover ~ factor(treatment) + numeric(year) +(1|Site), family = Gaussian | | | | |
|  | Estimate | Standard Error | T-value | P-value |
| Intercept | 9.61 | 4.42 | 2.17 | 0.031 |
| treatmentDOS | 11.06 | 2.52 | 4.38 | 0.000 |
| treatmentEGS | 4.14 | 2.52 | 1.64 | 0.103 |
| treatmentMGS | 5.22 | 2.56 | 2.04 | 0.043 |
| treatmentLGS | 11.11 | 2.52 | 4.41 | 0.000 |
| Year | 3.93 | 0.72 | 5.47 | 0.000 |

**Table S5.** Output of the linear mixed effects model examining the effects of treatment and year on grass percent cover over four years (2020–2023) after two iterations of dormant (DOS), early growing- (EGS), mid-growing- (MGS), and late (LGS) growing-season fire at nine sites dominated by shortleaf or loblolly pine in Tennessee, South Carolina, Alabama, and Mississippi.

| Response Variable: Grass Percent Cover | | | | |
| --- | --- | --- | --- | --- |
| Model: grass percent cover ~ factor(treatment) + numeric(year) +(1|Site), family = Gaussian | | | | |
|  | Estimate | Standard Error | T-value | P-value |
| Intercept | 46.17 | 7.69 | 6.00 | 0.000 |
| treatmentDOS | 6.33 | 3.41 | 1.86 | 0.065 |
| treatmentEGS | 0.00 | 3.41 | 0.00 | 1.000 |
| treatmentMGS | 1.87 | 3.47 | 0.54 | 0.590 |
| treatmentLGS | -0.56 | 3.41 | -0.16 | 0.871 |
| Year | -4.65 | 0.97 | -4.79 | 0.000 |

**Table S6.** Output of the linear mixed effects model examining the effects of treatment and year on semi-woody percent cover over four years (2020–2023) after two iterations of dormant (DOS), early growing- (EGS), mid-growing- (MGS), and late (LGS) growing-season fire at nine sites dominated by shortleaf or loblolly pine in Tennessee, South Carolina, Alabama, and Mississippi.

| Response Variable: Semi-Woody Percent Cover | | | | |
| --- | --- | --- | --- | --- |
| Model: semi-woody percent cover ~ factor(treatment) + numeric(year) +(1|Site), family = Gaussian | | | | |
|  | Estimate | Standard Error | T-value | P-value |
| Intercept | 47.19 | 6.71 | 7.03 | 0.000 |
| treatmentDOS | -8.72 | 3.04 | -2.87 | 0.005 |
| treatmentEGS | -20.50 | 3.04 | -6.75 | 0.000 |
| treatmentMGS | -9.11 | 3.09 | -2.95 | 0.004 |
| treatmentLGS | -13.08 | 3.04 | -4.31 | 0.000 |
| Year | 2.21 | 0.87 | 2.55 | 0.012 |

**Table S7.** Output of the linear mixed effects model examining the effects of treatment and year on woody understory percent cover over four years (2020–2023) after two iterations of dormant (DOS), early growing- (EGS), mid-growing- (MGS), and late (LGS) growing-season fire at nine sites dominated by shortleaf or loblolly pine in Tennessee, South Carolina, Alabama, and Mississippi.

| Response Variable: Woody Percent Cover | | | | |
| --- | --- | --- | --- | --- |
| Model: woody percent cover ~ factor(treatment) + numeric(year) +(1|Site), family = Gaussian | | | | |
|  | Estimate | Standard Error | T-value | P-value |
| Intercept | 30.09 | 6.38 | 4.71 | 0.000 |
| treatmentDOS | -9.39 | 2.22 | -4.24 | 0.000 |
| treatmentEGS | -13.75 | 2.23 | -6.16 | 0.000 |
| treatmentMGS | -9.35 | 2.25 | -4.15 | 0.000 |
| treatmentLGS | -9.25 | 2.22 | -4.17 | 0.000 |
| Year | 3.08 | 0.63 | 4.87 | 0.000 |
